# Supplementary material for: Integrated Analysis of Genetic Diversity in Costus pictus through Phenotypic Characterization, Molecular Markers and UHPLC-MS-Based Diosgenin Profiling
Source: Research Square preprint supplement (doi:10.21203/rs.3.rs-6538032/v1), 2025-05-13
Supplement: Supplementary file 1 [file 11c92f27532e610abad48965.docx]

**Integrated Analysis of Genetic Diversity in Costus pictus through Phenotypic Characterization, Molecular Markers and UHPLC-MS-Based Diosgenin Profiling**

Ragul P1, Chitra Rajagopal2*,Kesiar Loudursamy3,Thanga Hemavathy A4, Vellaikumar S5, Rajagopal B5, Karthikeyan P 6

1 Department of Spices, Plantation, Medicinal & Aromatic crops, Horticultural college and Research Institute

Tamil Nadu Agricultural University, Coimbatore, Tamil Nadu, India.

*2Department of Floriculture and Landscape, Horticultural college and Research Institute, Tamil Nadu Agricultural University, Coimbatore, Tamil Nadu, India.*

*3Horticultural college and Research Institute, Tamil Nadu Agricultural University, Coimbatore, Tamil Nadu, India*

*4Department of Pulses, Centre for Plant breeding and Genetics, Tamil Nadu Agricultural University, Coimbatore, Tamil Nadu, India.*

*5Department of Plant Biotechnology, Centre for Plant Molecular Biology & Biotechnology,Tamil Nadu Agricultural University, Coimbatore, Tamil Nadu, India.*

*6Field Application Specialist, Spinco, Chennai, Tamil Nadu, India*

Chitra.varadhraj@gmail.com

**
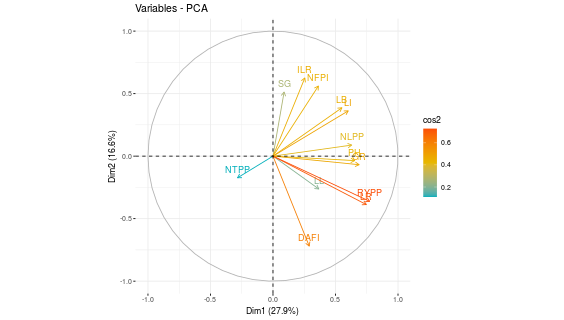
 Supplementary Fig 5:** Contribution of different traits to the total divergence. The traits are showed by color red include traits include RYPP (Rhizome yield per plant), LR (Length Rhizome) and blue colour traits include NTPP (Number of tillers per plant), and grey color indicates LL (Length length), light greenish colour appear SG (Stem Girth) and yellow colour traits include (ILR) Internodal length of rhizome, LB (Leaf breadth), NFPI (Number of flower per inflorescence ), NLPP (Number of leaves per plant), LB (leaf breadth), PH (plant height), DAFI (Days after flowers initiation) and GR (Girth of Rhizome).
