# Supplementary material for: Integrated Analysis of Genetic Diversity in Costus pictus through Phenotypic Characterization, Molecular Markers and UHPLC-MS-Based Diosgenin Profiling
Source: Research Square preprint supplement (doi:10.21203/rs.3.rs-6538032/v1), 2025-05-13
Supplement: Supplementary file 3 [file 737a785d7a75260a08d18ec8.docx]

| **Sl.no** | **Primer name** | **Primer Sequence 5’-3’** | **Annealing**  **T0c** | **Total number of bands** | **Polymorphism (%)** | **PIC value** | **Primer index** | **Rp value** |
| --- | --- | --- | --- | --- | --- | --- | --- | --- |
| 1 | UBC 809 | AGAGAGAGAGAGAGAGG | 47 | 63 | 88.8 | 0.86 | 0.89 | 4.70 |
| 2 | UBC 810 | GAGAGAGAGAGAGAGAT | 40 | 75 | 60 | 0.61 | 0.51 | 2.30 |
| 3 | UBC 811 | GAGAGAGAGAGAGAGAC | 40 | 55 | 100 | 0.84 | 0.81 | 2.50 |
| 4 | UBC 818 | CACACACACACACACAG | 46 | 107 | 60 | 0.56 | 0.43 | 1.10 |
| 5 | UBC 827 | ACACACACACACACACG | 46 | 83 | 91 | 0.90 | 0.88 | 3.65 |
| 6 | UBC 835 | AGAGAGAGAGAGAGAGYC | 53.8 | 37 | 85.7 | 0.82 | 0.70 | 2.10 |
| 7 | UBC 841 | GAGAGAGAGAGAGAGAYC | 50 | 115 | 100 | 0.88 | 0.97 | 5.05 |
| 8 | UBC 861 | ACCACCACCACCACCACC | 55 | 79 | 100 | 0.86 | 0.91 | 3.50 |
| 9 | UBC 862 | AGCAGCAGCAGCAGCAGC | 54 | 45 | 100 | 0.85 | 0.89 | 3.85 |
| 10 | UBC 879 | CTT CAC TTC ACT TCA | 37 | 140 | 16.6 | 0.11 | 0.10 | 0.25 |
| 11 | UBC 888 | BDBCACACACACACACA | 37 | 49 | 100 | 0.66 | 0.43 | 1.40 |
| 12 | UBC 891 | TGTGTGTGTGTGTGHVH | 42.2 | 36 | 85.7 | 0..74 | 0.61 | 1.35 |

**Integrated Analysis of Genetic Diversity in Costus pictus through Phenotypic Characterization, Molecular Markers and UHPLC-MS-Based Diosgenin Profiling**

Ragul P1, Chitra Rajagopal2*,Kesiar Loudursamy3,Thanga Hemavathy A4, Vellaikumar S5, Rajagopal B5, Karthikeyan P 6

1 Department of Spices, Plantation, Medicinal & Aromatic crops, Horticultural college and Research Institute

Tamil Nadu Agricultural University, Coimbatore, Tamil Nadu, India.

*2Department of Floriculture and Landscape, Horticultural college and Research Institute, Tamil Nadu Agricultural University, Coimbatore, Tamil Nadu, India.*

*3Horticultural college and Research Institute, Tamil Nadu Agricultural University, Coimbatore, Tamil Nadu, India*

*4Department of Pulses, Centre for Plant breeding and Genetics, Tamil Nadu Agricultural University, Coimbatore, Tamil Nadu, India.*

*5Department of Plant Biotechnology, Centre for Plant Molecular Biology & Biotechnology,Tamil Nadu Agricultural University, Coimbatore, Tamil Nadu, India.*

*6Field Application Specialist, Spinco, Chennai, Tamil Nadu, India*

[Chitra.varadharaj@gmail.com](mailto:Chitra.varadharaj@gmail.com)

**Supplementary Table 1**: Polymorphism among the Insulin plant genotypes detected by ISSR markers
