# Supplementary material for: Integrated Analysis of Genetic Diversity in Costus pictus through Phenotypic Characterization, Molecular Markers and UHPLC-MS-Based Diosgenin Profiling
Source: Research Square preprint supplement (doi:10.21203/rs.3.rs-6538032/v1), 2025-05-13
Supplement: Supplementary file 5 [file 9baf3441cd9b1ab6e1b8e297.docx]

**Integrated Analysis of Genetic Diversity in Costus pictus through Phenotypic Characterization, Molecular Markers and UHPLC-MS-Based Diosgenin Profiling**

Ragul P1, Chitra Rajagopal2*,Kesiar Loudursamy3,Thanga Hemavathy A4, Vellaikumar S5, Rajagopal B5, Karthikeyan P 6

1 Department of Spices, Plantation, Medicinal & Aromatic crops, Horticultural college and Research Institute

Tamil Nadu Agricultural University, Coimbatore, Tamil Nadu, India.

*2Department of Floriculture and Landscape, Horticultural college and Research Institute, Tamil Nadu Agricultural University, Coimbatore, Tamil Nadu, India.*

*3Horticultural college and Research Institute, Tamil Nadu Agricultural University, Coimbatore, Tamil Nadu, India*

*4Department of Pulses, Centre for Plant breeding and Genetics, Tamil Nadu Agricultural University, Coimbatore, Tamil Nadu, India.*

*5Department of Plant Biotechnology, Centre for Plant Molecular Biology & Biotechnology,Tamil Nadu Agricultural University, Coimbatore, Tamil Nadu, India.*

*6Field Application Specialist, Spinco, Chennai, Tamil Nadu, India*

[Chitra.varadharaj@gmail.com](mailto:Chitra.varadharaj@gmail.com)

**Supplementary fig 2: PCR amplification of Twenty genotypes with primer – UBC 841**


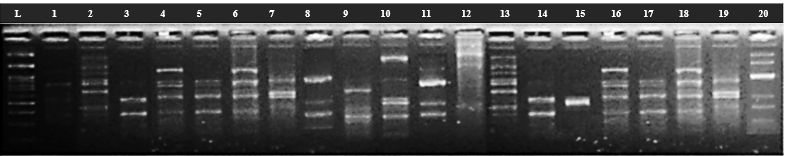


| 3000bp |
| --- |
| 1500bp |
| 1000bp |
| 900bp |
| 200bp |
| 100bp |
