# Supplementary material for: Integrated Analysis of Genetic Diversity in Costus pictus through Phenotypic Characterization, Molecular Markers and UHPLC-MS-Based Diosgenin Profiling
Source: Research Square preprint supplement (doi:10.21203/rs.3.rs-6538032/v1), 2025-05-13
Supplement: Supplementary file 6 [file ca875599efa6a36e092ccd85.docx]

**Integrated Analysis of Genetic Diversity in Costus pictus through Phenotypic Characterization, Molecular Markers and UHPLC-MS-Based Diosgenin Profiling**

Ragul P1, Chitra Rajagopal2*,Kesiar Loudursamy3,Thanga Hemavathy A4, Vellaikumar S5, Rajagopal B5, Karthikeyan P 6

1 Department of Spices, Plantation, Medicinal & Aromatic crops, Horticultural college and Research Institute

Tamil Nadu Agricultural University, Coimbatore, Tamil Nadu, India.

*2Department of Floriculture and Landscape, Horticultural college and Research Institute, Tamil Nadu Agricultural University, Coimbatore, Tamil Nadu, India.*

*3Horticultural college and Research Institute, Tamil Nadu Agricultural University, Coimbatore, Tamil Nadu, India*

*4Department of Pulses, Centre for Plant breeding and Genetics, Tamil Nadu Agricultural University, Coimbatore, Tamil Nadu, India.*

*5Department of Plant Biotechnology, Centre for Plant Molecular Biology & Biotechnology,Tamil Nadu Agricultural University, Coimbatore, Tamil Nadu, India.*

*6Field Application Specialist, Spinco, Chennai, Tamil Nadu, India*

[Chitra.varadharaj@gmail.com](mailto:Chitra.varadharaj@gmail.com)

**Supplementary Table 2. Representation of trait variability, indicated by the genotypes located at the positive or negative extremes of the principal components.**

| Traits | Highly diverse genotypes |
| --- | --- |
| Number of tiller per plant (NTPP), Days after flowers Initiation (DAFI), Rhizome yield per plant (RYPP), Girth of Rhizome (GR), Length of Rhizome (LR) | IISRNAGS9101, APCP16, KLCP14, TNCP13, APCP11, KLCP6, KLCP3 |
| Stem girth (SG), Internodal length of rhizome (ILR), Number of flowers per inflorescence (NFPI), | TNCP20, TNCP19, TNCP17 |
| Number of Leaves per plant (NLPP), Plant height (PH) | PYCP1,KLCP18 |
