# Supplementary material for: Integrated Analysis of Genetic Diversity in Costus pictus through Phenotypic Characterization, Molecular Markers and UHPLC-MS-Based Diosgenin Profiling
Source: Research Square preprint supplement (doi:10.21203/rs.3.rs-6538032/v1), 2025-05-13
Supplement: Supplementary file 8 [file ee8156b3287fbb54a1dcd389.docx]

**Integrated Analysis of Genetic Diversity in Costus pictus through Phenotypic Characterization, Molecular Markers and UHPLC-MS-Based Diosgenin Profiling**

Ragul P1, Chitra Rajagopal2*,Kesiar Loudursamy3,Thanga Hemavathy A4, Vellaikumar S5, Rajagopal B5, Karthikeyan P 6

1 Department of Spices, Plantation, Medicinal & Aromatic crops, Horticultural college and Research Institute

Tamil Nadu Agricultural University, Coimbatore, Tamil Nadu, India.

*2Department of Floriculture and Landscape, Horticultural college and Research Institute, Tamil Nadu Agricultural University, Coimbatore, Tamil Nadu, India.*

*3Horticultural college and Research Institute, Tamil Nadu Agricultural University, Coimbatore, Tamil Nadu, India*

*4Department of Pulses, Centre for Plant breeding and Genetics, Tamil Nadu Agricultural University, Coimbatore, Tamil Nadu, India.*

*5Department of Plant Biotechnology, Centre for Plant Molecular Biology & Biotechnology, Tamil Nadu Agricultural University, Coimbatore, Tamil Nadu, India.*

*6Field Application Specialist, Spinco, Chennai, Tamil Nadu, India*

[chitra.varadharaj@gmail.com](mailto:chitra.varadharaj@gmail.com)

**Supplementary Table 3:** Diosgenin content of *Costus pictus* rhizome by UHPLC-MS analysis

| **S.No** | **Sample Name** | **Diosgenin (µg/g)** |
| --- | --- | --- |
| 1 | PYCP1 | 83.707 |
| 2 | TNCP2 | 87.297 |
| 3 | KLCP3 | 78.841 |
| 4 | IISR Acc.NAGS9101 | 30.733 |
| 5 | KLCP5 | 81.99 |
| 6 | KLCP6 | 14.501 |
| 7 | TNCP7 | 15.04 |
| 8 | KACP8 | 10.999 |
| 9 | TNCP9 | 354.05 |
| 10 | TNCP10 | 148.93 |
| 11 | APCP11 | 42.543 |
| 12 | TNCP12 | 38.3 |
| 13 | TNCP13 | 68.903 |
| 14 | KLCP14 | 22.38 |
| 15 | KACP15 | 3.365 |
| 16 | APCP16 | 11.076 |
| 17 | TNCP17 | 26.881 |
| 18 | KLCP18 | 28.491 |
| 19 | TNCP19 | 13.84 |
| 20 | TNCP20 | 65.505 |
